# Supplementary material for: Outcomes of Peripheral Vascular Interventions in Select Patients With Lower Extremity Acute Limb Ischemia
Source: PubMed Central journal article supplement — J Am Heart Assoc. 2018 Apr 12;7(8):e004782. doi: 10.1161/JAHA.116.004782 (PMC6015405; doi:10.1161/jaha.116.004782), 2018-04-12
Supplement: JAH3-7-e004782-s001.pdf [file JAH3-7-e004782-s001.pdf]

## SUPPLEMENTAL MATERIAL

### Appendix

#### Vascular Study Group of New England Investigators:

- Samuel C. Aldridge, MD, Lakes Region General Hospital, Laconia, NH
- Cristobal Alvarado, MD, MaineGeneral Medical Center, Augusta, ME
- Yvon Baribeau, Cardiothoracic Surgical Associates, Manchester, NH
- Robert A. Cambria, MD, Eastern Maine Medical Center, Bangor, ME
- Wilfred Carney, Berkshire Medical Center, Pittsfield, MA
- Mark Conrad, Massachusetts General Hospital, Boston, MA
- Matthew Conway, MD, Rutland Regional Medical Center, Rutland, VT
- Kenneth S. Danielson, MD, Cottage Hospital, Woodsville, NH
- Alan Dietzek, Danbury Hospital, Danbury, CT
- Ibrahim Eid, MD, St. Anne's Hospital, Fall River, MA
- Alik Farber, Boston Medical Center, Boston, MA
- Scott Fecteau, St. Francis Hospital and Medical Center, Hartford, CT
- Martin Fogle, MD, St. Anne's Hospital, Fall River, MA
- James Gallagher, MD, Hartford Hospital, Hartford, CT
- Philip Goodney, Dartmouth-Hitchcock Medical Center, Lebanon, NH
- Mark Hirko, Baystate Medical Center, Springfield, MA
- Peter Hunt, MD, Elliott Health system, Manchester, NH
- Mark D. Iafrati, MD, Tufts Medical Center, Boston, MA

- Jeff Index, Yale-New Haven Hospital, New Haven, CT
- Allan M. Ingraham, MD, Central Maine Medical Center, Lewiston, ME
- Jens Eldrup-Jorgensen, MD, Maine Medical Center and Mercy Hospital, Portland, ME
- Matthew Menard, MD, Brigham & Women's Hospital, Boston, MA
- Joseph P. Meyer, MD, Concord Hospital, Concord, NH
- Brian W. Nolan, MD, Dartmouth-Hitchcock Medical Center, Lebanon, NH
- Carl Pierce, Maine General Medical Center, Augusta, ME
- Victor Pisanelli, Rutland Regional Medical Center, Rutland, VT
- Frank Pomposelli, St. Elizabeth's Medical Center, Brighton, MA
- Roger Rosen, St. Luke's Hospital, New Bedford, MA
- Parvis J. Sadighi, MD, Berkshire Medical Center, Pittsfield, MA
- Andres Schanzer, MD, UMass Memorial Health Care, Worcester, MA
- Marc Schermerhorn, MD, Beth Israel Deaconess Medical Center, Boston, MA
- Andrew C. Stanley, MD, Fletcher Allen Health Care, Burlington, VT
